# Supplementary material for: The rectification control and physiological relevance of potassium channel OsAKT2
Source: PubMed Central journal article supplement (PMC8644434; doi:10.1093/plphys/kiab462), 2021-10-02
Supplement: kiab462_supplementary_data.pdf [file kiab462_supplementary_data.pdf]

1 **Supplemental Data**

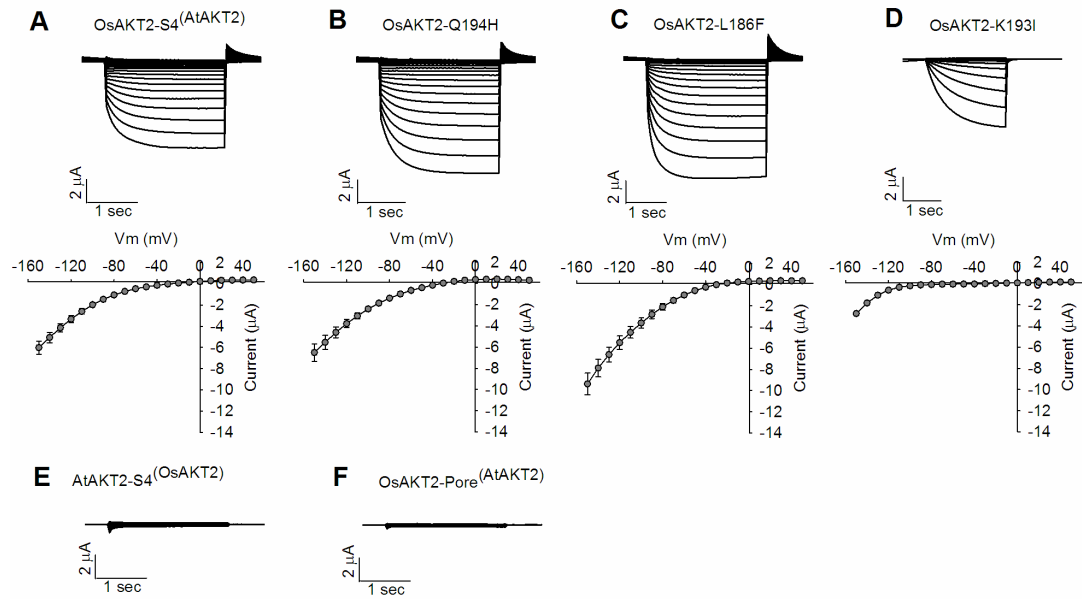

2

3 **Supplemental Figure S1. Effects of substitutions or point mutations that do not**  
 4 **affect the rectification of OsAKT2 and AtAKT2.**

5 Representative recordings (upper panels) and currents-voltage relationships (lower  
 6 panels) of the AKT2 mutants measured in 50 mM K<sup>+</sup>, pH 7.4: A, OsAKT2-S4<sup>(AtAKT2)</sup>,  
 7 B, OsAKT2-Q194H, C, OsAKT2-L186F, D, AtAKT2-K193I. E, The intact  
 8 substitution of S4 AtAKT2-S4<sup>(OsAKT2)</sup> or F, pore motif OsAKT2-Pore<sup>(AtAKT2)</sup> caused  
 9 no detectable current with AtKAT2. Data were means  $\pm$ SE (n = 4 - 8).

10

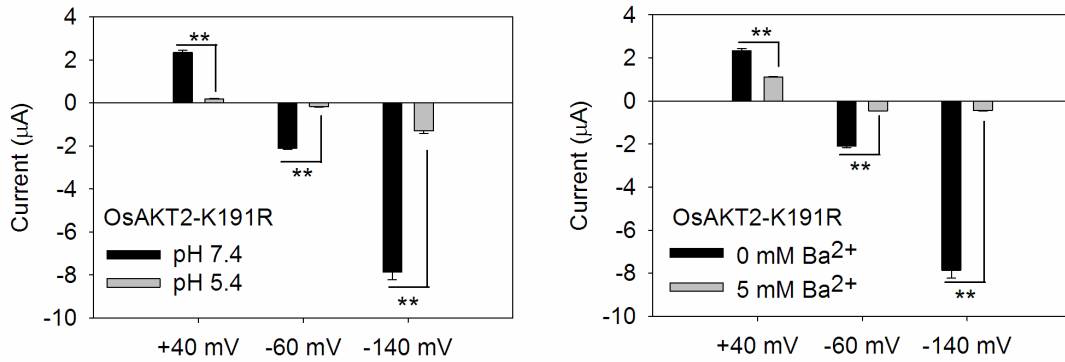

11

12

13 **Supplemental Figure S2. Effect of external pH and Ba<sup>2+</sup> on OsAKT2-K191R.**

14 Currents measured at different membrane potentials (+40, -60 and -140 mV) under 50  
15 mM K<sup>+</sup> for OsAKT2-K191R in pH 7.4 (black) or pH 5.4 (grey) baths (left).

16 Sensitivity to Ba<sup>2+</sup> (5 mM, right). Currents were recorded in 50 mM K<sup>+</sup> baths (pH 7.4).

17 Data were means ± SE (n = 4). \*p < 0.05, \*\*p < 0.01 (Student's *t*-test).

|                |        | <b>Ankyrin domain</b> |                                 |     |  |
|----------------|--------|-----------------------|---------------------------------|-----|--|
| <b>Repeat1</b> | OsAKT2 | 536                   | NIPCNLTVAATGNSSELEDLLKVGMDPDV   | 565 |  |
|                | AtAKT2 | 540                   | NIASNTIAVVTTGNAALIDELLKAKLSPDI  | 569 |  |
|                | OsAKT1 | 565                   | DLPITICFAVTRGDDEFHQLLKRGMDPNE   | 594 |  |
|                | AtAKT1 | 517                   | DLPLNICFAAIREDDLHQLLKRGLDPNE    | 546 |  |
| <b>Repeat2</b> | OsAKT2 | 569                   | KGRITALHIAASKGYEDCVLVLLKQACNVNI | 598 |  |
|                | AtAKT2 | 573                   | KKTPPLHVAASRGYEDCVLVLLKHGCNIHI  | 602 |  |
|                | OsAKT1 | 598                   | DGHTALHIAASKGNEQCVRLLEYGADPNA   | 627 |  |
|                | AtAKT1 | 550                   | NGRTPPLHIAASKGTLNCVLLLEYHADPNC  | 579 |  |
| <b>Repeat3</b> | OsAKT2 | 602                   | QNTALWNAIAARHKKIFNIYHFARVSSP    | 631 |  |
|                | AtAKT2 | 606                   | NGNSALWEAIIISKHYEIFRIYHFAAISDP  | 635 |  |
|                | OsAKT1 | 631                   | EGKVPWLWEALCEKHAADVQLVEGGADLSS  | 660 |  |
|                | AtAKT1 | 583                   | EGSVPLWEAMVEGHEKVVKVLEHGSTIDA   | 612 |  |
| <b>Repeat4</b> | OsAKT2 | 634                   | AAGDLICIAARRGDLDTLRELLKHGLAVDS  | 663 |  |
|                | AtAKT2 | 637                   | IAGDLICEAAKQNNVEVMKALLKQCLNVDT  | 666 |  |
|                | OsAKT1 | 662                   | DTGLYACIAVEESDTELLNDIIHYGDEVNR  | 691 |  |
|                | AtAKT1 | 614                   | LVGHFACIAAEQGNLKLKEIVLHGDVTR    | 643 |  |
| <b>Repeat5</b> | OsAKT2 | 667                   | DCATAPVALAEGHADVARLIVINCASVER   | 696 |  |
|                | AtAKT2 | 670                   | HCVTALCVMAEDQMDMVNLITATNCALVVC  | 699 |  |
|                | OsAKT1 | 695                   | DGTTALHRAVCDGNVQMAELILEHGCALIDK | 724 |  |
|                | AtAKT1 | 647                   | TGTSALHTAVCEENIEMVKYLLEQCALVNK  | 676 |  |
| <b>Repeat6</b> | OsAKT2 | 699                   | HNEQQAAAA..VSVDELREIMKTR.....E  | 722 |  |
|                | AtAKT2 | 702                   | HN.....EFTPLEK.....             | 711 |  |
|                | OsAKT1 | 727                   | NGWTPRALAECCGHDDIQLIFRSRKAATAS  | 757 |  |
|                | AtAKT1 | 679                   | HGWTPRDIAECCGHEDIKALIFREK.....L | 704 |  |

18

19 **Supplemental Figure S3. Amino acid sequence alignment of the ANK domains**  
 20 **among AKT2 and AKT1 channels.**

21 The sequences were aligned using DNAMAN software. The access numbers of  
 22 aligned sequences were: AtAKT1 (NP\_180233), OsAKT1 (AK120308), OsAKT2  
 23 (JN989970) and AtAKT2 (AAA97865). Conserved amino acids were highlighted in  
 24 black.

### S4

|               |     |   |    |    |    |    |    |    |     |    |     |     |     |     |
|---------------|-----|---|----|----|----|----|----|----|-----|----|-----|-----|-----|-----|
| <b>OsAKT2</b> | 179 | L | LG | IL | RL | WR | LR | RV | KQ  | EF | FTR | LEK | DIR | 204 |
| <b>HvAKT2</b> | 171 | L | LG | IL | RL | WR | LR | RV | KQ  | EF | FTR | LEK | DIR | 196 |
| <b>AtAKT2</b> | 183 | L | LG | LL | RF | WR | LR | RV | KHL |    | FTR | LEK | DIR | 208 |
| <b>ZMK2</b>   | 177 | M | LG | V  | LR | WR | LR | RV | KQ  | EF | FTR | LEK | DIR | 202 |
| <b>NKT2</b>   | 176 | V | LG | M  | LR | WR | LR | RV | KQ  | EF | FTR | LEK | DMR | 201 |
| <b>VFK1</b>   | 163 | L | LG | M  | LR | WR | LR | RV | KQ  | EF | FTR | LEK | DIR | 188 |
| <b>PTK2</b>   | 170 | L | LG | LL | RF | WR | LR | RV | KQL |    | FTR | LEK | DIR | 195 |
| <b>VvK3.1</b> | 188 | L | LG | LL | RF | WR | LR | RV | KQL |    | FTR | LEK | DIR | 213 |
| <b>GhAKT2</b> | 198 | L | LG | LL | RF | WR | LR | RV | KQL |    | FTR | LEK | DIR | 223 |
| <b>MhAKT2</b> | 210 | F | LG | LL | RF | WR | LR | RA | KQL |    | FTR | LEK | DIR | 235 |
| <b>SbAKT2</b> | 170 | M | LG | V  | LR | WR | LR | RV | KQ  | EF | FTR | LEK | DIR | 195 |
| <b>SPICK1</b> | 188 | L | LG | M  | LR | WR | LR | RM | KQ  | EF | FTR | LEK | DIR | 213 |
| <b>SPICK2</b> | 185 | L | LG | M  | LR | WR | LR | RV | KQ  | Y  | FTR | LEK | DIR | 210 |

25

26

27 **Supplemental Figure S4. S4 amino acid sequence comparison among known**  
 28 **AKT2 channels.**

29 Plant species and corresponding AKT2 channels analyzed were: *Oryza sativa*,  
 30 OsAKT2 (JN989970); *Hordeum vulgare*, HvAKT2 (DQ465923); *Arabidopsis*  
 31 *thaliana*, AtAKT2 (AAA97865); *Zea mays*, ZmK2.1 (AJ132686); *Nicotiana tabacum*,  
 32 NKT2 (AB196789); *Vicia faba*, VFK1(Y10579); *Populus tremula*, PTK2  
 33 (AJ271447.1); *Vitis vinifera*, VvK3.1 (XM\_002268888.3); *Gossypium hirsutum*,  
 34 GhAKT2 (NM\_001327179); *Malus hupehensis*, MhAKT2 (JN632525); *Sorghum*  
 35 *bicolor*, SbAKT2 (XM\_002441096); *Samanea saman pulvinus*, SPICK1 (AF099095)  
 36 and SPICK2 (AF145272). The red frame highlighted the distinct residue we focused  
 37 on in this study.

38

39 **Supplemental Table S1. Primer sequences used in this study.**

| 40 | <b>Primer name</b>                                             | <b>Primer sequence (5' - 3')</b>               |
|----|----------------------------------------------------------------|------------------------------------------------|
| 41 | <b>Primers used for OsAKT2 clone</b>                           |                                                |
| 42 | OsAKT2-F                                                       | GGCCCGGGATGAAGACCTCGAGCTTC                     |
| 43 | OsAKT2-R                                                       | TCCGCGGCCGCCTATGATCCAGACACCGAGTCCA             |
| 44 | <b>Primers used for site-directed mutagenesis construction</b> |                                                |
| 45 | OsAKT2-S4 <sup>(AtAKT2)</sup> -F1                              | cgtctcaggagagtcagcatctcTTCACAAGGCTGGAGAAGGA    |
| 46 | CA                                                             |                                                |
| 47 | OsAKT2-S4 <sup>(AtAKT2)</sup> -R1                              | ttgactctctgagacgccagaaccggagtaaGCCGAGGAGGCTGAA |
| 48 | CGC                                                            |                                                |
| 49 | OsAKT2-S4 <sup>(AtAKT2)</sup> -F2                              | CAGGtactctTACTTCTGGATCCGCTGCGCCCG              |
| 50 | OsAKT2-S4 <sup>(AtAKT2)</sup> -R2                              | CAGAAGTAagagtaCCTGATGTCCTTCTCCAGCCT            |
| 51 | OsAKT2-Pore <sup>(AtAKT2)</sup> -F1                            | CACCgcagcaatcTACTGGTCCATCACCACCATGA            |
| 52 | OsAKT2-Pore <sup>(AtAKT2)</sup> -R1                            | AGTAGattgtgcGGTGTAGCGGATCCACAGGC               |
| 53 | OsAKT2-Pore <sup>(AtAKT2)</sup> -F2                            | cacgcctcaaacaccatcGAGATGATCTTCAACATCTTCTAC     |
| 54 | ATGC                                                           |                                                |
| 55 | OsAKT2-Pore <sup>(AtAKT2)</sup> -R2                            | atggtgtttgaggcgtgcaaGTCGCCGTAGCCGACGGT         |
| 56 | OsAKT2-K193I-F1                                                | cgagaattcacgcgtgttaccATGAAGACCTCGAGCTTCGAGA    |
| 57 | OsAKT2-K193I-R1                                                | tccagccttgTGAAGAACTGTATGACCTTCCTGAGA           |
| 58 | OsAKT2-K193I-F1                                                | cagttcttcaCAAGGCTGGAGAAGGACATCA                |
| 59 | OsAKT2-K193I-R2                                                | tcatgtctgctcgaagcggcgcCTATGATCCAGACACCGAGTCCA  |
| 60 | OsAKT2-R190K-F                                                 | GCGTCTCaagAAGGTCAAGCAGTTCTTCACAAGG             |
| 61 | OsAKT2-R190K-R                                                 | TGACCTTcttGAGACGCCATAGCCGGAGGATG               |
| 62 | OsAKT2-K191R-F                                                 | AGGcgaGTCAAGCAGTTCTTCACAAGGCTGGA               |
| 63 | OsAKT2-K191R-R                                                 | AACTGCTTGACtcgCCTGAGACGCCATAGCCGG              |
| 64 | OsAKT2-Q194H-F                                                 | GGAAGGTCAAGcatTTCTTCACAAGGCTGGAGAAGG           |
| 65 | OsAKT2-Q194H-R                                                 | GAAatgCTTGACCTTCCTGAGACGCCATAGCC               |
| 66 | OsAKT2-L186F-F                                                 | ttcTGGCGTCTCAGGAAGGTCAAGCAGTTCTT               |
| 67 | OsAKT2-L186F-R                                                 | TTCCTGAGACGCCAgaacCCGGAGGATGCCGAGGAG           |

68 OsAKT2-R190K-K191R-F TCTCaagcgaGTCAAGCAGTTCTTCACAAGGCT  
69 OsAKT2-R190K-K191R-R TGCTTGACtcgcttGAGACGCCATAGCCGGAGG  
70 OsAKT2-ANK<sup>(OsAKT1)</sup>-F1 cgagaattcacgcgtggtaccATGAAGACCTCGAGCTTCGA  
71 A  
72 OsAKT2-ANK<sup>(OsAKT1)</sup>-R1 aattggcaaatcGCCGTGGTCTGACTCGCC  
73 OsAKT2-ANK<sup>(OsAKT1)</sup>-F2 accacggcGATTTGCCAATTACACTCTGTTTTG  
74 OsAKT2-ANK<sup>(OsAKT1)</sup>-R2 agtcgacgacgatggtACTCGCCGTCGCCGCCTT  
75 OsAKT2-ANK<sup>(OsAKT1)</sup>-F3 gagtACCATCGTCGTCGACTCGC  
76 OsAKT2-ANK<sup>(OsAKT1)</sup>-R3 tcatgtctgctcgaagcggccgcCTATGATCCAGACACCGAGT  
77 CCA  
78 OsAKT1-ANK<sup>(OsAKT2)</sup>-F1 cgagaattcacgcgtggtaccATGGCGAGGTGGGGCGCC  
79 OsAKT1-ANK<sup>(OsAKT2)</sup>-R1 cggtatggtCAGATTTCCCCGAGCTAGCA  
80 OsAKT1-ANK<sup>(OsAKT2)</sup>-F2 ggggaaatctgAACATAACCGTGCAATCTGCTGA  
81 OsAKT1-ANK<sup>(OsAKT2)</sup>-R2 tgggacgtgatggtggccGACCGGGTGCGCGAGCTC  
82 OsAKT1-ANK<sup>(OsAKT2)</sup>-F3 tcGGCCACCATCACGTCCCA  
83 OsAKT1-ANK<sup>(OsAKT2)</sup>-R3 tcatgtctgctcgaagcggccgcGCTCTTGCTTTTCATCTTCTC  
84 TG  
85 AtAKT2-F cgagaattcacgcgtggtaccATGGACCTCAAGTATTCAGCATCTC  
86 AtAKT2-R tcatgtctgctcgaagcggccgcCTAAATTATCTTGTTTACGACAAAGTAGA  
87 GTT  
88 AtAKT2-S4<sup>(OsAKT2)</sup>-F1 atggcgacttcgaaaggttaaacagttcTTCCTAGGCTCGAGAAGG  
89 ACAT  
90 AtAKT2-S4<sup>(OsAKT2)</sup>-R1 cctttcgaagtcgcatagtctaaggatTCCCAAGAGATTACAAGTG  
91 ATATTTAACG  
92 AtAKT2-S4<sup>(OsAKT2)</sup>-F2 AGAttcaacTATTTCTGGATTTCGCTGCTTTTCGA  
93 AtAKT2-S4<sup>(OsAKT2)</sup>-R2 CCAGAAATAgttgaaTCTTATGTCCTTCTCGAGCCTAGTG  
94 AtAKT2-R194K-F GGCGACTTaagAGAGTTAAACACCTCTTCACTAGGCTC  
95 AtAKT2-R194K-R AACTCTcttAAGTCGCCAAAATCTAAGTAATCCC  
96 AtAKT2-R195K-F GCGACTTCGAaagGTTAAACACCTCTTCACTAGGCTCG  
97 AtAKT2-R195K-R TAACcttTCGAAGTCGCCAAAATCTAAGTAAT

98 AtAKT2-R194K-R195K-F GGCGACTTaagaagGTAAACACCTCTTCACTAGGC  
99 TCG

100 AtAKT2-R194K-R195K-R TAACcttcttAAGTCGCCAAAATCTAAGTAATCCC

101 **Primers used for qPCR**

102 OsAKT2-qF AGCCGTCATCCGGGAGGTCGGC

103 OsAKT2-qR TCAATCTCCGCTCCTTCGTCGTT

104 OsActin-qF TGGTCGTACCACAGGTATTGTGTT

105 OsActin-qR AAGGTCGAGACGAAGGATAGCAT

106 OsCBL1-qF CGATGGGCTCATCAATAAGG

107 OsCBL1-qR CCCCCTTTTCTTCACATCAA

108 OsCIPK23-qF GCCTCCAAGGTTTGAGACAG

109 OsCIPK23-qR GCCAAGATTGAGACCCTGAG

110 **Primers used for promoter clone**

111 OsAKT2-promoter-F gagctcggtagccggggatccCAGCTTGCCCAGGTCGAGG

112 OsAKT2-promoter-R ttaccctcagatctaccatggTGCTACCAGAAGACGTTGCACA

113 **Primers used for eGFP fluorescence observation**

114 OsAKT2-eGFP-F1 cgagaattcacgcgtggtaccATGAAGACCTCGAGCTTCGAGA

115 OsAKT2-eGFP-R1 tgctcaccatTGATCCAGACACCGAGTCCATC

116 OsAKT2-eGFP-F2 gtctggatcaATGGTGAGCAAGGGCGAGG

117 OsAKT2-eGFP-R2 tcatgtctgctgaagcggccgcTCACTTGTACAGCTCGTCCATGC

---
